# Supplementary material
Source: PubMed Central journal article supplement (PMC8445799)
Supplement: mmc1.pdf [file mmc1.pdf]

| <b>Variable</b>          | <b>Data available(N=1673)</b> | <b>Missing data(%)</b> |
|--------------------------|-------------------------------|------------------------|
| <b>Creatinine</b>        | 1638                          | 2                      |
| <b>Age</b>               | 1673                          | 0                      |
| <b>Gender</b>            | 1673                          | 0                      |
| <b>Smoking</b>           | 1673                          | 0                      |
| <b>CHF</b>               | 1673                          | 0                      |
| <b>COPD</b>              | 1673                          | 0                      |
| <b>CKD</b>               | 1673                          | 0                      |
| <b>Oxygen saturation</b> | 1666                          | 0.35                   |
| <b>Lymphocytes</b>       | 1672                          | 0                      |
| <b>Platelet count</b>    | 1603                          | 4                      |
| <b>AST</b>               | 1618                          | 3.2                    |
| <b>Lactate elevation</b> | 1361                          | 18.6                   |
| <b>Albumin</b>           | 1623                          | 2.9                    |
| <b>Procalcitonin</b>     | 1152                          | 31                     |
| <b>Troponin</b>          | 886                           | 46                     |

<sup>a</sup> AST, aspartate transaminase, CHF, congestive heart failure; CKD, chronic kidney disease; COPD, chronic obstructive pulmonary disease.

Supplemental Table: Missing values of included predictor variables.
